# Supplementary material for: Prediction of Lung Function in Adolescence Using Epigenetic Aging: A Machine Learning Approach
Source: Preprints.org preprint supplement (doi:10.20944/preprints202009.0168.v1), 2020-09-08
Supplement: Supplementary file 1 [file supplementary]

**Supplementary materials:** Prediction of lung function in adolescence using epigenetic aging: a machine learning approach

**Table S1.** Summary of the variables IOWBC 10- and 18-year matched samples.

| **Features** | **Age 10** | **Age 18** |
| --- | --- | --- |
| FEV1 | 2.04 ± 0.29 | 4.151±0.786 |
| Female (%) | 43.25 | same |
| Height (cm) | 139.07 ± 6.19 | 171.71 ± 9.39 |
| Weight (kg) | 35.22 ± 7.56 | 69.01 ± 14.25 |
| BMI (kg/m2) | 18.10 ± 2.98 | 23.32 ± 4.58 |
| Ever asthma | 63 (19.33) | 94 (28.83) |
| Eczema | 81 (24.85) | 61 (18.71) |
| Hay fever | 65 (19.94) | 109 (33.46) |
| AA | 19.10 ± 7.98 | 8.25 ± 8.26 |
| AAres | -0.008 ± 3.99 | -0.06 ± 3.78 |
| IEAA | -0.007 ± 3.90 | -0.07 ± 3.49 |

Data are presented as n (%) for categorical and mean ± SD for continuous variables.

**Table S2.** Mutual information regression scores for predicting FEV1 and FVC at 18 years

| Features | FEV1 | FVC |
| --- | --- | --- |
| Sex | 0.4243 | 0.4015 |
| AA | 0.0443 | 0.0292 |
| AAres | 0.0277 | 0 |
| IEAA | 0.0021 | 0 |
| Eczema | 0 | 0.0314 |
| Hayfever | 0.0364 | 0 |
| Weight | 0.114 | 0.1257 |
| FEV1_10 | 0.2452 | 0.2097 |
| BMI | 0.0434 | 0.0046 |
| Smoking | 0.0253 | 0 |
| Height | 0.4675 | 0.5735 |
| Asthma | 0.0237 | 0 |

**Table S3.** Results of five regression models predicting FEV1 using best features and AAs

| **Added feature** | **Regression model** | **R2** | **RMSE** |
| --- | --- | --- | --- |
| AA | Linear | 74.91 ± 8.28 | 0.3782 ± 0.0720 |
|  | Lasso  ( α = 0.0001) | 74.90 ± 8.26 | 0.3784 ± 0.0719 |
|  | Ridge  (α = 0.4) | 74.96 ± 8.16 | 0.3782 ± 0.0716 |
|  | Elastic Net  (α = 0.001) | 74.91 ± 8.17 | 0.3785 ± 0.0714 |
|  | Bayesian Ridge | 74.93 ± 8.23 | 0.3782 ± 0.0718 |
| AAres | Linear | 74.81 ± 7.88 | 0.3793 ± 0.0683 |
|  | Lasso  ( α = 0.0001) | 74.83 ± 7.80 | 0.3793 ± 0.0682 |
|  | Ridge  (α = 0.4) | 74.87 ± 7.79 | 0.3790 ± 0.0683 |
|  | Elastic Net  (α = 0.001) | 74.81 ± 7.87 | 0.3793 ± 0.0680 |
|  | Bayesian Ridge | 74.84 ± 7.84 | 0.3791 ± 0.0683 |
| IEAA | Linear | 74.77 ± 7.81 | 0.3796 ± -0.0673 |
|  | Lasso  ( α = 0.0001) | 74.77 ± 7.81 | 0.3796 ± 0.0673 |
|  | Ridge  (α = 0.4) | 74.83 ± 7.72 | 0.3793 ± 0.0673 |
|  | Elastic Net  (α = 0.001) | 74.79 ± 7.73 | 0.3796 ± 0.0670 |
|  | Bayesian Ridge | 74.8 ± 7.77 | 0.3794 ± 0.0673 |

The models were developed using best four features (height, sex, weight at age 18 and FEV1 at age 10) with AAs (AA, AAres, and IEAA respectively) as predictors of FEV1. Here, R2 = average goodness-of-fit measure for regression models represented as percentage and RMSE = average root mean square error

**Table S4.** Results of five regression models predicting FEV1 using best features and AAresdiff and IEAAdiff

| **Added feature** | **Regression model** | **R2** | **RMSE** |
| --- | --- | --- | --- |
| AAresdiff | Linear | 74.85 ± 7.46 | 0.3792 ± 0.0644 |
|  | Lasso  ( α = 0.0001) | 74.86 ± 7.45 | 0.3792 ± 0.0644) |
|  | Ridge  (α = 0.4) | 74.90 ± 7.38 | 0.3790 ± 0.0646) |
|  | Elastic Net  (α = 0.001) | 74.90 ± 7.40 | 0.3789 ± 0.0643) |
|  | Bayesian Ridge | 74.88 ± 7.43 | 0.3791 ± 0.0645 |
| IEAAdiff | Linear | 74.83 ± 7.53 | 0.3793 ± 0.0647 |
|  | Lasso  ( α = 0.0001) | 74.83 ± 7.52 | 0.3792 ± 0.0646 |
|  | Ridge  (α = 0.4) | 74.88 ± 7.44 | 0.3791 ± 0.0648 |
|  | Elastic Net  (α = 0.001) | 74.87 ± 7.46 | 0.3791 ± 0.0646 |
|  | Bayesian Ridge | 74.86 ± 7.49 | 0.3791 ± 0.0647) |

The models were developed using best four features (height, sex, weight at age 18 and FEV1 at age 10) with AAresdiff and IEAAdiff respectively as predictors of FEV1. Here, AAresdiff = AAres at 18 – AAres at 10, IEAAdiff = IEAA at 18 – IEAA at 10, R2 = average goodness-of-fit measure for regression models represented as percentage and RMSE = average root mean square error

**Table S5.** Results of five regression models predicting FVCusing best features and AAs

| **Added feature** | **Regression model** | **R2** | **RMSE** |
| --- | --- | --- | --- |
| AA | Linear | 74.85 ± 7.69 | 0.4485 ± 0.0729 |
|  | Lasso  ( α = 0.0001) | 74.87 ± 07.66 | 0.4484 ± 0.0727 |
|  | Ridge  (α = 0.4) | 74.87 ± 7.60 | 0.4486 ± 0.0722 |
|  | Elastic Net  (α = 0.0025) | 75.04 ± 7.32 | 0.4475 ± 0.0711 |
|  | Bayesian Ridge | 74.87 ± 07.66 | 0.4485 ± 0.0726 |
| AAres | Linear | 75.10 ± 7.30 | 0.4467 ± 0.0701 |
|  | Lasso  ( α = 0.0001) | 75.12 ± 7.28 | 0.4466 ± 0.0700 |
|  | Ridge  (α = 0.4) | 75.11 ± 7.21 | 0.4469 ± 0.0693 |
|  | Elastic Net  (α = 0.0025) | 75.24 ± .0701 | 0.4460 ± 0.0687 |
|  | Bayesian Ridge | 75.12 ± .0726 | 0.4467 ± 0.0698 |
| IEAA | Linear | 75.01 ± .0741 | 0.4475 ± 0.0706 |
|  | Lasso  ( α = 0.0001) | 75.02 ± .0738 | 0.4473 ± 0.0704 |
|  | Ridge  (α = 0.4) | 75.02 ± .0732 | 0.4476 ± 0.0698 |
|  | Elastic Net  (α = 0.0025) | 75.18 ± .0708 | 0.4464 ± 0.0689 |
|  | Bayesian Ridge | 75.02 ± .0737 | 0.4474 ± 0.0703 |

The models were developed using best four features (height, sex, weight at age 18 and FVC at age 10) with AAs (AA, AAres, and IEAA respectively) as predictors of FVC. Here, R2 = average goodness-of-fit measure for regression models represented as percentage and RMSE = average root mean square error

**Table S6.** Results of five regression models predicting FVCusing best features and AAresdiff and IEAAdiff

| **Added feature** | **Regression model** | **R2** | **RMSE** |
| --- | --- | --- | --- |
| AAresdiff | Linear | 75.13 ± .0703 | 0.4467 ± 0.0668 |
|  | Lasso  ( α = 0.0001) | 75.14 ± .0703 | 0.4466 ± 0.0669 |
|  | Ridge  (α = 0.4) | 75.13 ± .0696 | 0.4469 ± 0.0662 |
|  | Elastic Net  (α = 0.0025) | 75.23 ± .0689 | 0.4461 ± 0.0669 |
|  | Bayesian Ridge | 75.14 ± .0700 | 0.4467 ± 0.0666 |
| IEAAdiff | Linear | 75.26 ± .0685 | 0.4458 ± 0.0659 |
|  | Lasso  ( α = 0.0001) | 75.27 ± .0685 | 0.4457 ± 0.0660 |
|  | Ridge  (α = 0.4) | 75.25 ± .0677 | 0.4460 ± 0.0653 |
|  | Elastic Net  (α = 0.0025) | 75.32 ± .0677 | 0.4455 ± 0.0660 |
|  | Bayesian Ridge | 75.27 ± .0682 | 0.4457 ± 0.0656 |

The models were developed using best four features (height, sex, weight at age 18 and FVC at age 10) with AAresdiff and IEAAdiff respectively as predictors of FVC. Here, AAresdiff = AAres at 18 – AAres at 10, IEAAdiff = IEAA at 18 – IEAA at 10, R2 = average goodness-of-fit measure for regression models represented as percentage and RMSE = average root mean square error

**
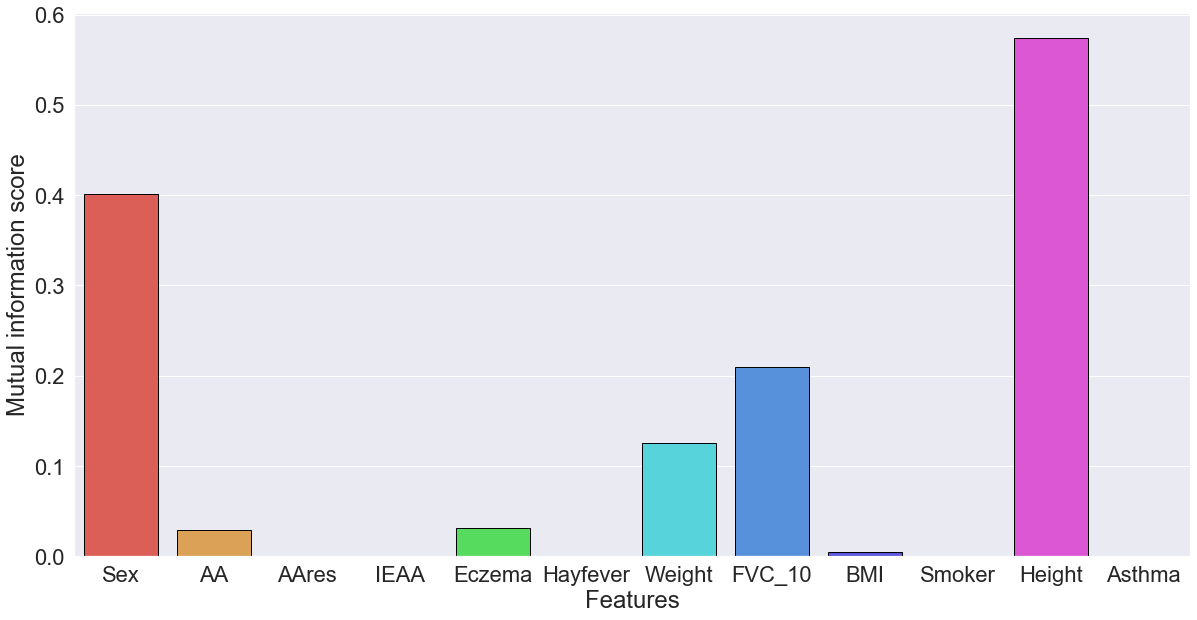
**

**Figure S1.** Mutual information score between each feature and the target which is FVC at age 18. Association of height and gender with FVC is higher than any of the other features.
